# Supplementary material
Source: PubMed Central journal article supplement (PMC2805064)
Supplement: NIHMS162584-supplement-Supplementary_Data.pdf [file NIHMS162584-supplement-Supplementary_Data.pdf]

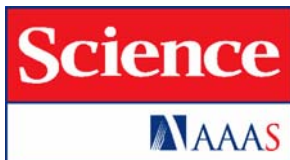

## Supporting Online Material for

### **Topographical and Temporal Diversity of the Human Skin Microbiome**

Elizabeth A. Grice, Heidi H. Kong, Sean Conlan, Clayton B. Deming, Joie Davis, Alice C. Young,  
NISC Comparative Sequencing Program, Gerard G. Bouffard, Robert W. Blakesley,  
Patrick R. Murray, Eric D. Green, Maria L. Turner, Julia A. Segre\*

\*To whom correspondence should be addressed. E-mail: [jsegre@nhgri.nih.gov](mailto:jsegre@nhgri.nih.gov)

Published 29 May 2009, *Science* **324**, 1190 (2009)  
DOI: 10.1126/science.1171700

#### **This PDF file includes:**

Materials and Methods

Figs. S1 to S6

Tables S1 to S7

References

Additional Authors (NISC Comparative Sequencing Program)

## SUPPORTING ONLINE MATERIALS

### Methods

**Subject recruitment and sampling:** To analyze intrapersonal variation between different skin sites, we selected 20 sites (Table 1), including sebaceous, dry, and moist body regions and comparable areas for sites with bilateral symmetry. The study protocol was approved by the NHGRI Institutional Review Board (08-HG-0059) and all subjects gave written informed consent. We obtained samples from ten healthy volunteers, including males and females ages 20-41 with different self-reported ethnicities, no history of chronic medical conditions or dermatologic diseases, and no active infections. To evaluate temporal variation, 5 of the 10 subjects were re-sampled 4-6 months after initial skin sampling. Skin preparation included using only Dove soap for hygiene for 7 days, avoiding topical antiseptics for 7 days, and avoiding all washing for 24 hours prior to sampling. Exclusion criteria included use of systemic antibiotics within 6 months of sampling. After obtaining medical and medication history, a complete dermatologic examination was performed. Study personnel changed sterile gloves before each sample collection to minimize sample cross-contamination. Samples were collected from non-overlapping regions of the sites, with no prior cleaning or preparation of the skin surface. Swabs were obtained from 4-cm<sup>2</sup> areas using cotton tipped applicators (CTA) (Medline Industries, Mundelstein, IL; #MDS202000) soaked in enzymatic lysis buffer (20 mM Tris pH 8, 2 mM EDTA, and 1.2% Triton X-100). Superficial skin scrapings were obtained from a 4-cm<sup>2</sup> area with a sterile disposable #15 blade. Skin scrapings were removed from blades using CTAs moistened in enzymatic lysis buffer. Negative controls of mock swabs and scrapings were collected and analyzed for each sampling. All clinical samples were stored at -80°C until further processing.

**DNA extraction and purification:** All biological specimens were first incubated in a preparation of enzymatic lysis buffer (20 mM Tris, pH 8.0, 2 mM EDTA, 1.2% Triton X-100) and lysozyme (20 mg/mL) for 30 minutes at 37°C. The standard protocol for lysing gram-positive

bacterial cells of the Invitrogen PureLink Genomic DNA kit (Carlsbad, CA; #K1820-02) was followed for all subsequent steps. Purified genomic DNA was resuspended in 50 µl of PureLink Genomic Elution Buffer and stored at -20°C.

**PCR amplification, cloning, and sequencing of 16S rRNA genes:** 16S rRNA genes were amplified from purified genomic DNA using the primers 8F (5'-AGAGTTTGATCCTGGCTCAG-3') and 1391R (5'-GACGGGCGGTGTGTRCA-3') (1). Takara Taq DNA Polymerase Hot-Start kit was used for amplifications (Takara Bio USA, Madison WI; #TAK R007A). For each 25-µl reaction, conditions were as follows: 2.5 µl 10X Buffer with MgCl<sub>2</sub>, 4 µl dNTP mix (2.5 mM each), 0.5 µl each primer (20 µM, IDT, Coralville IA), 2 µl clinical genomic DNA, and 0.25 µl Takara HS Taq polymerase. For each DNA sample, 3 replicates were performed. Thermocycling was as follows: initial denaturation at 95°C for 5 minutes, followed by 25-30 cycles of a 30 second 95°C denaturation, 30 second annealing at 55°C, and 1.5 minute elongation at 72°C, all followed by a final extension of 10 minutes at 72°C. Cycle number was determined on a case-by-case basis, such that amplification was still in the linear range of the reaction when stopped, but sufficient PCR product for cloning was produced (usually 25-28 cycles). PCR products were then separated on an agarose gel, and bands corresponding to the ~1.3-kb product were extracted. Negative control (no template) PCR reactions were performed with each set of amplifications and in all cases did not produce an amplification product. PCR products were extracted using the Qiaquick Gel Extraction kit (Qiagen, Valencia CA; #28706), resuspended in 30 µl of Buffer EB, cloned into the pCR2.1-TOPO vector (Invitrogen, Carlsbad, CA) and resulting plasmids transformed per the manufacturer's protocol. At least 384 of the resulting bacterial colonies per ligation were picked, plasmid DNA was purified, and plasmid inserts were sequenced at NISC on an ABI 3730xl sequencer (Applied Biosystems Inc., Foster City CA) using M13 primers flanking the insert and a

universal internal primer at position 522 (5'-CAGCMGCCGCGGTAATWC). Clones were re-picked if the average Q20 read length was <300 bases or the pass rate was <50%.

### **Analysis Pipeline**

*Sequencing assembly, alignment, and chimera elimination.* Traces were base called using Phred (v 0.990722.g), trimmed using Crossmatch and assembled for each clone using Phrap (v 0.990329) with the default parameters except force level was 9 and the mismatch penalty was -1 (2, 3). Overall assembly quality was assessed using a measure of cumulative error, the average probability of a base being miscalled, defined as:

$$\text{Error}_{\text{Cumulative}} = (\sum 10^{-Q_i/10}) / L, \text{ where } Q_i = \text{Phred score at position } i; L = \text{sequence length}$$

The resulting assemblies and quality data were stored in an Oracle database along with descriptive data for each sample. Sequences were further screened against the human genome, classified using the RDP classifier (4), aligned using the Greengenes (5) NAST aligner (6) and chimera checked using the implementation of Bellerophon (v.3) at Greengenes (7) using default parameters. Sequences were omitted from further analysis if they had a cumulative error >0.02; or matched the human genome (E-value < 0.1); or were less than 1,250 base pairs long; or were flagged as putative chimeras. A total of 168,524 assemblies were generated. Of those, 1,679 were putative chimeras, 7,767 were short or were homologous to human sequence, and 32,161 were of low quality using the above standards. Sequences were assigned to taxonomy using the Ribosomal Database Project (RDP) naïve Bayesian classifier (8). A residual group of 187 non-chimeric sequences were unclassifiable.

*Operational taxonomic unit clustering.* OTUs were identified using the Distance-based Richness and OTU (DOTUR) software (9). Olsen-corrected distance matrices were calculated by importing non-chimeric NAST-aligned sequences into ARB (10). The Hugenholtz lane mask (lanemaskPH; included with Greengenes ARB database) was applied to exclude hypervariable regions. The resulting distance matrix was then analyzed in DOTUR to calculate OTUs using the furthest-neighbor algorithm and a similarity cutoff of 99%.

*Diversity Estimation.* The Shannon Diversity Index ( $H'$ ) was calculated using DOTUR as follows:

$$H' = -\sum p_i \ln(p_i)$$

Where  $p_i$  is the relative abundance of the  $i$ th OTU. The Shannon Equitability Index ( $E_{H'}$ ), which measures OTU evenness, was calculated separately using spreadsheet software as follows:

$$E_{H'} = H'/\ln(S)$$

Where  $p_i$  is the relative abundance of the  $i$ th OTU and  $S$  is the number of total OTUs at 99% similarity threshold.

*Statistical comparison of clone libraries.* The SONS program was used to compare clone libraries at a specific phylogenetic level of 99% OTU identity (11). Shared community membership was calculated as a Jaccard index value (Jclas column 16 output), which falls between 0 and 1: a value of 0 implies that the two communities do not share any OTUs and a value of 1 implies that the communities share all OTUs. Specifically,

$$J_{clas} = S_{12} / (S_1 + S_2 - S_{12})$$

Where  $S_1$  and  $S_2$  represent the number of OTUs observed in communities A and B.

Shared community structure was calculated as a Theta index value ( $\theta_N$ ; ThetaN column 20 output), which also falls between 0 and 1: a value of 1 implies identical community structure and a value of 0 implies dissimilar community structure.  $\theta_N$  accounts for relative abundance of OTUs shared between communities A and B and thus measures shared community structure (12).

$$\theta_N = [\sum (X_i/n_{total}) \cdot \sum (Y_i/m_{total})] / [\sum (X_i/n_{total}) + \sum (Y_i/m_{total}) - [\sum (X_i/n_{total}) \cdot \sum (Y_i/m_{total})]$$

Where  $X_i$  and  $Y_i$  are the abundance of the  $i^{th}$  OTU in communities A and B and  $m_{total}$  and  $n_{total}$  represent total number of sequences sampled in A and B.

#### SUPPLEMENTARY REFERENCES

1. P. B. Eckburg *et al.*, *Science* **308**, 1635 (2005).
2. B. Ewing, P. Green, *Genome Res* **8**, 186 (1998).
3. B. Ewing, L. Hillier, M. C. Wendl, P. Green, *Genome Res* **8**, 175 (1998).
4. Q. Wang, G. M. Garrity, J. M. Tiedje, J. R. Cole, *Appl Environ Microbiol* **73**, 5261 (2007).
5. T. Z. DeSantis *et al.*, *Appl Environ Microbiol* **72**, 5069 (2006).
6. T. Z. DeSantis, Jr. *et al.*, *Nucleic Acids Res* **34**, W394 (2006).
7. T. Huber, G. Faulkner, P. Hugenholtz, *Bioinformatics* **20**, 2317 (2004).
8. J. R. Cole *et al.*, *Nucleic Acids Res* **35**, D169 (2007).
9. P. D. Schloss, J. Handelsman, *Appl Environ Microbiol* **71**, 1501 (2005).
10. W. Ludwig *et al.*, *Nucleic Acids Res* **32**, 1363 (2004).
11. P. D. Schloss, J. Handelsman, *Appl Environ Microbiol* **72**, 6773 (2006).
12. J. C. Yue, M. K. Clayton, *Commun. Stat. Theor. M.* **34**, 2123 (2005).

## Figures and Tables

**Figure S1:** The 20 selected skin sites and their location on the human body. The sites represent three microenvironments: sebaceous (blue), dry (red), and moist (green).

**Figure S2:** Taxonomic profile for each healthy volunteer at each site. Y-axis represents relative abundance. See Figure S1 for key to site codes on x-axis. Superscripts on taxon name indicate phylum: 1-Actinobacteria; 2-Firmicutes; 3-Proteobacteria; 4-Bacteroidetes.

**Figure S3:** Complexity of bacterial communities colonizing skin sites. A. Median taxonomic richness of sites as measured by observed OTUs at 99% similarity threshold. B. Median taxonomic evenness, or the relative distribution of sequences across OTUs, of sites as measured by the Shannon equitability index. Error bars represent median absolute deviation. See Figure S1 for key to site codes displayed on the X-axis.

**Figure S4:** Intrapersonal and interpersonal similarity of antecubital fossa, axilla, and volar forearm. Bars represent the mean of pair-wise values calculated for each healthy volunteer. Error bars represent the standard error of the mean. \* indicates significance by one-tailed paired  $t$  test,  $P < 0.05$ . See Table S2 for index and error values.

**Figure S5:** Similarity of swabs and scrapes. Intrapersonal sample variation is less than interpersonal variation for A. antecubital fossa, B. axilla, C. occiput, and D. volar forearm.  $P < 0.003$  by one-tailed  $t$  test for both Jaccard and Theta indices and for all four sites Error bars represent the standard error of the mean.

**Figure S6:** Longitudinal stability of the skin microbiome for each re-sampled volunteer. Y-axis represents relative abundance. Healthy volunteer (HV) ID is at the right of each chart. See Figure S1 for key to skin sites on X-axis. A “-1” after the site abbreviation indicates the initial visit and a “-2” indicates the follow-up visit 4-6 months after the first sampling. Superscripts on taxon name indicate phylum: 1-Actinobacteria; 2-Firmicutes; 3-Proteobacteria; 4-Bacteroidetes.

**Table S1:** Number of sequences analyzed per healthy volunteer at each site and each sampling method. Does not include chimeric and low-quality sequences that were removed before analysis. A “-1” after the healthy volunteer identification number indicates the initial visit and a “-2” indicates the follow-up visit 4-6 months after the first sampling. Notation with site codes (see Figure S1 for legend) indicate: Sc=scrape, Sw=swab, L=left, R=right.

**Table S2:** Abundance of major bacterial groups when sites are clustered into microenvironments (sebaceous, moist, or dry).

**Table S3:** Shared community membership (measured by the Jaccard index) and community structure (measured by the Theta index) of the symmetric left/right skin sites. The controls are calculated by averaging interpersonal index scores for the same site. SE is standard error.

**Table S4:** Shared community membership (measured by Jaccard index) and community structure (measured by Theta index) of scrapes and swabs of the same sites obtained from the same volunteer. The controls are calculated by averaging interpersonal index scores for the same site. SE is standard error.

**Table S5:** Shared community membership (measured by Jaccard index) and community structure (measured by Theta index) comparing interpersonal variation at each site. SE is standard error.



**Tables S6 (A-C):** Shared community membership (measured by median Jaccard index) and community structure (measured by median Theta index) of sites associated with A. atopic dermatitis, B. psoriasis, and C. the nare, a site that is not cornified like the other 19 sites. The three highest pair-wise scores are highlighted in yellow.

**Table S7:** Longitudinal shared community membership (measured by Jaccard index) and community structure (measured by Theta index) of sites. When considering all sites together, 4 of the 5 healthy volunteers re-sampled were found to be significantly more like themselves over time than they were like other volunteers (Jaccard index:  $P=0.037$ ,  $<0.001$ ,  $<0.001$ , and  $0.008$  and Theta index:  $P<0.001$ ,  $0.003$ ,  $<0.001$ ,  $0.002$  for volunteers 1, 3, 4, and 6, respectively). Controls are calculated by averaging interpersonal variation of the indices.

Grice *et al*, Figure S1

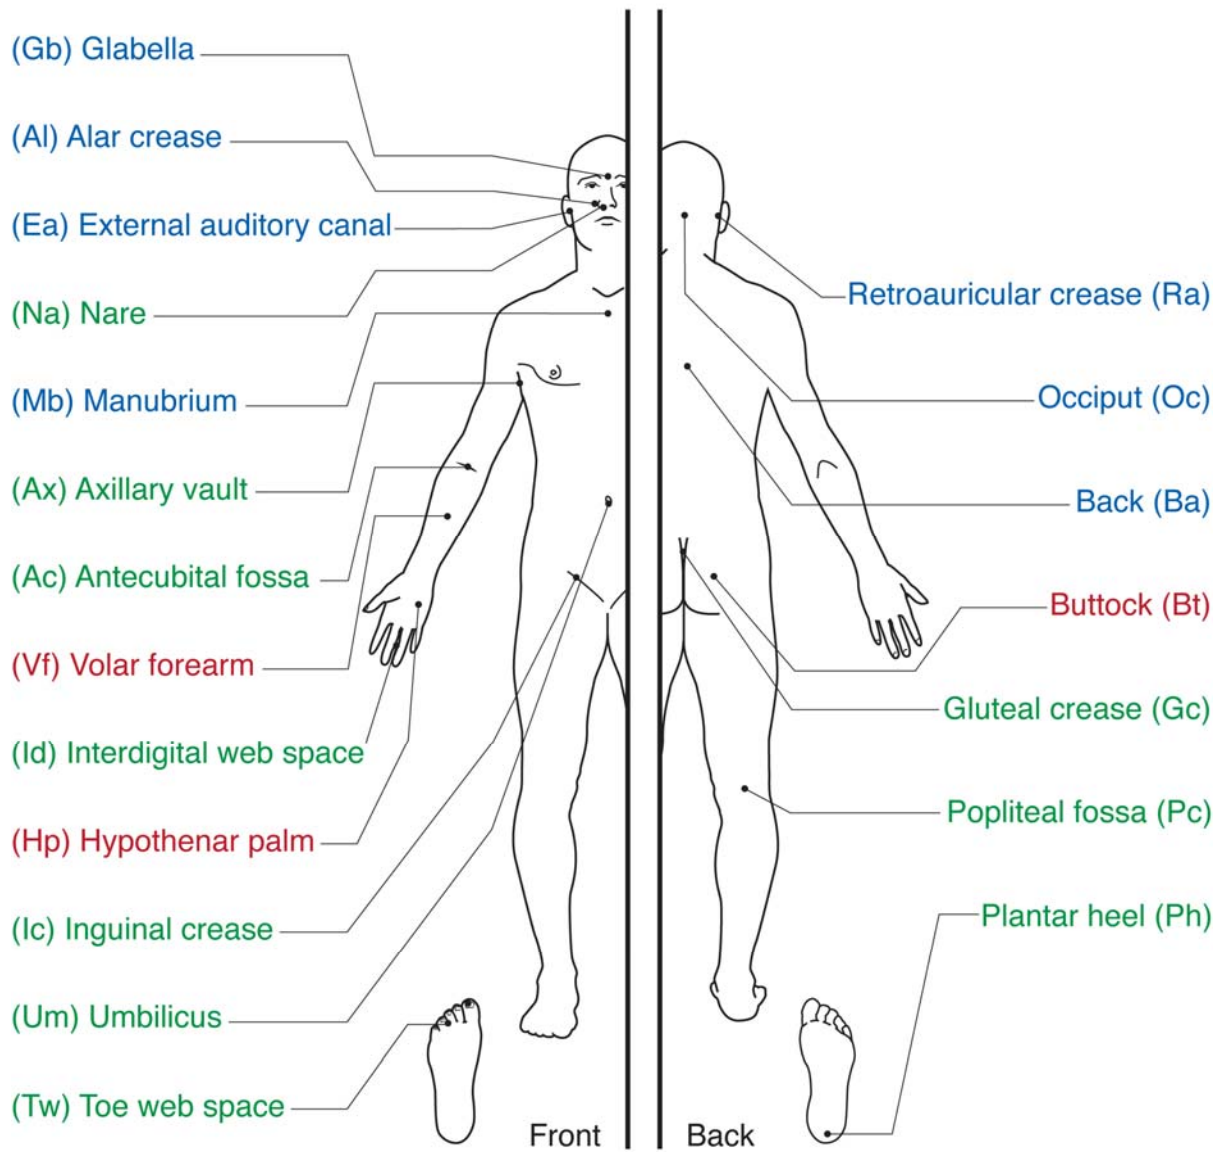

Grice *et al*, Figure S2

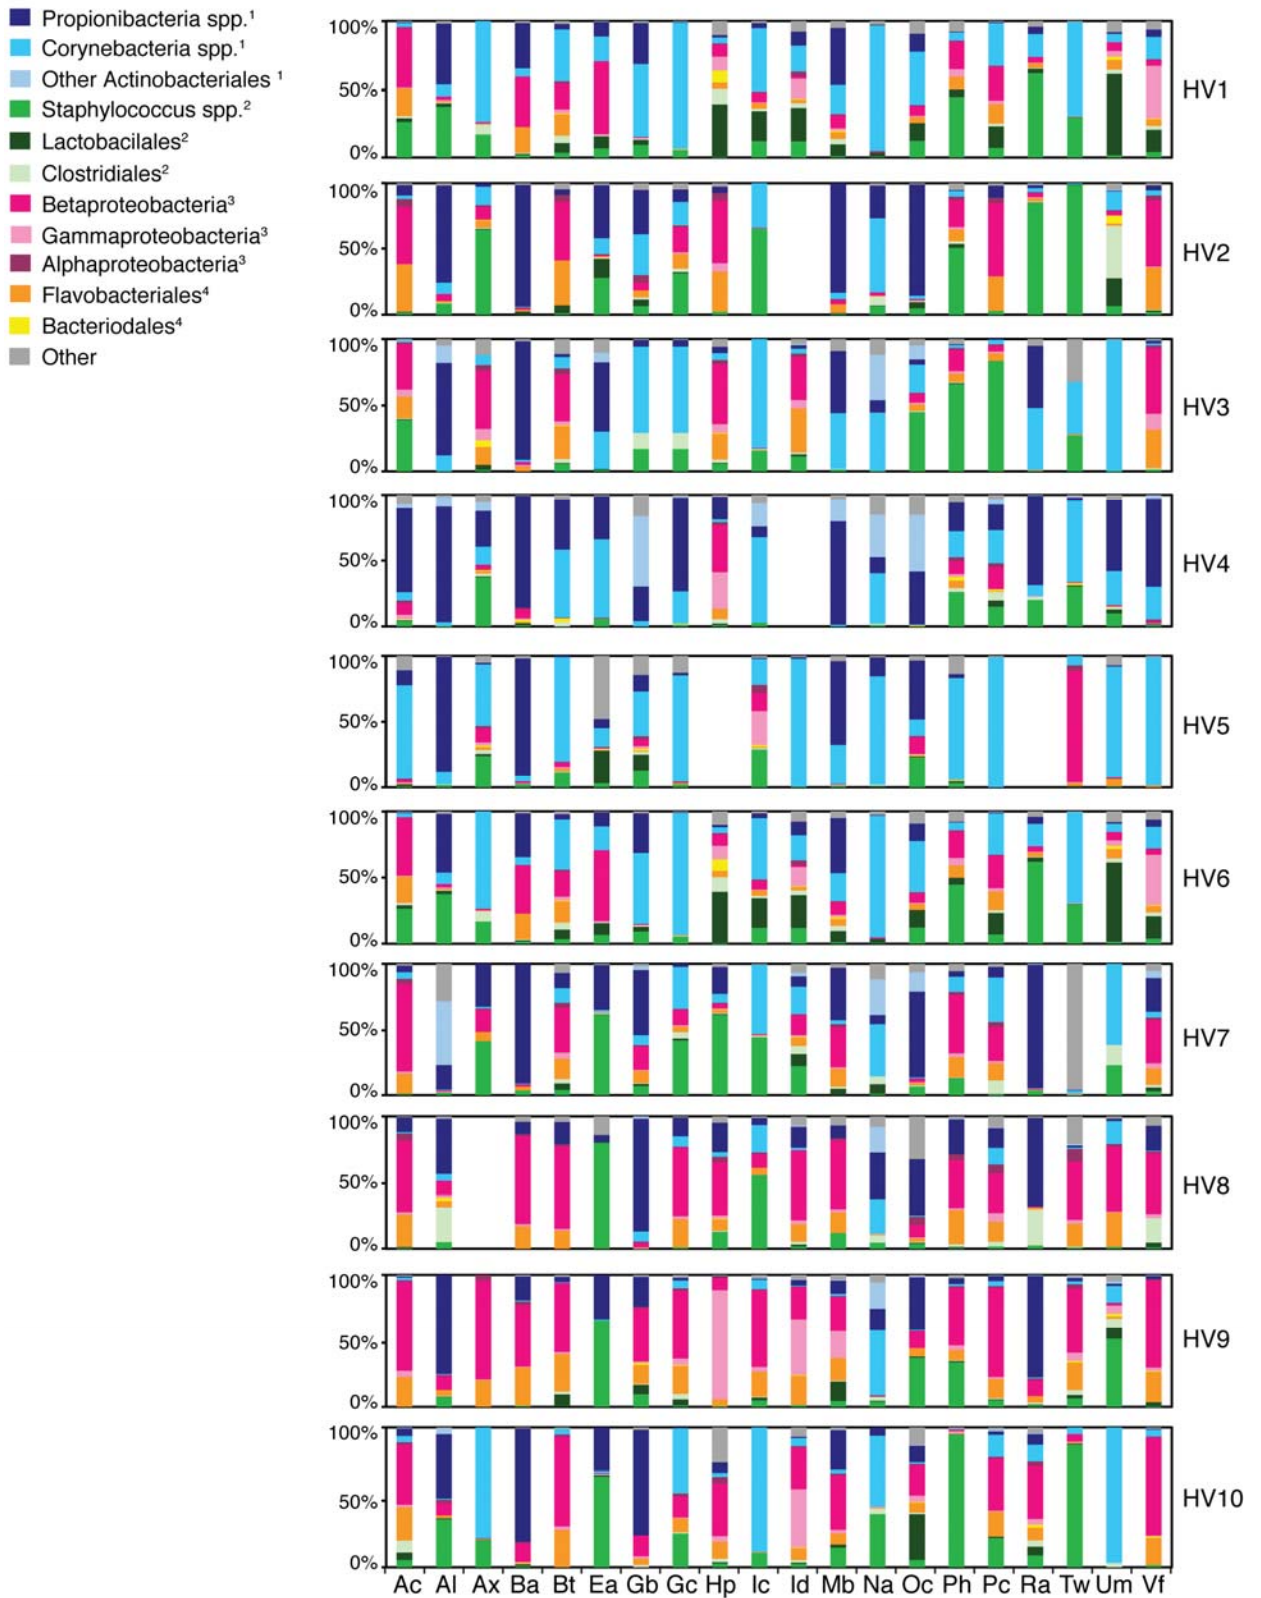

Grice *et al*, Figure S3

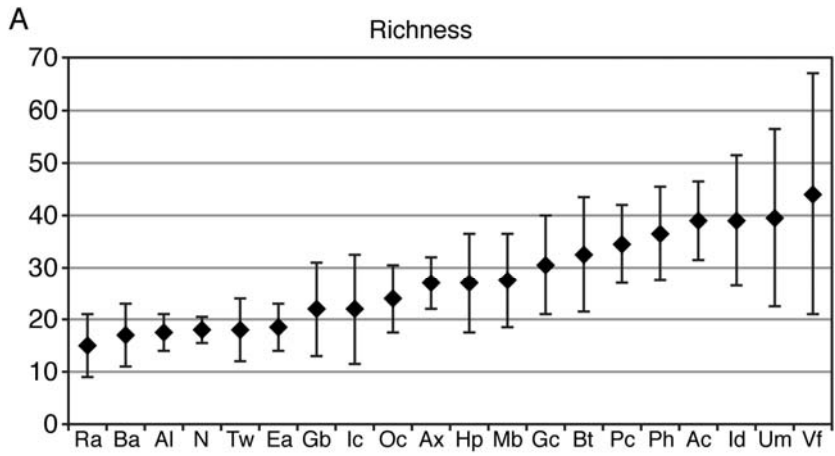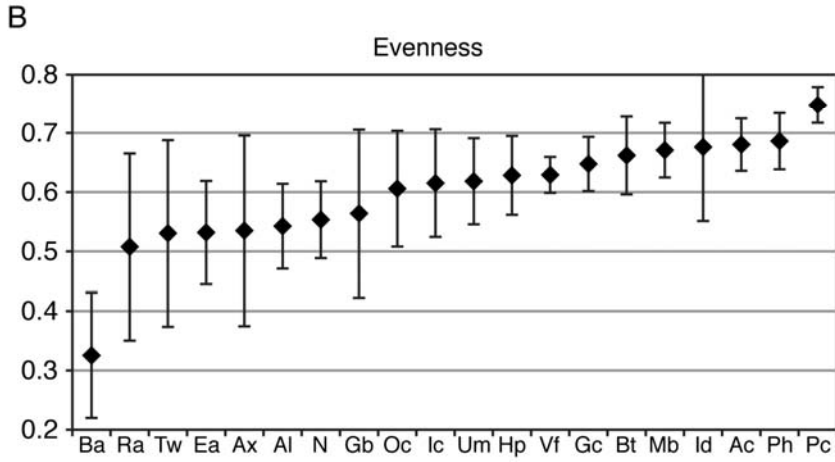

Grice *et al*, Figure S4

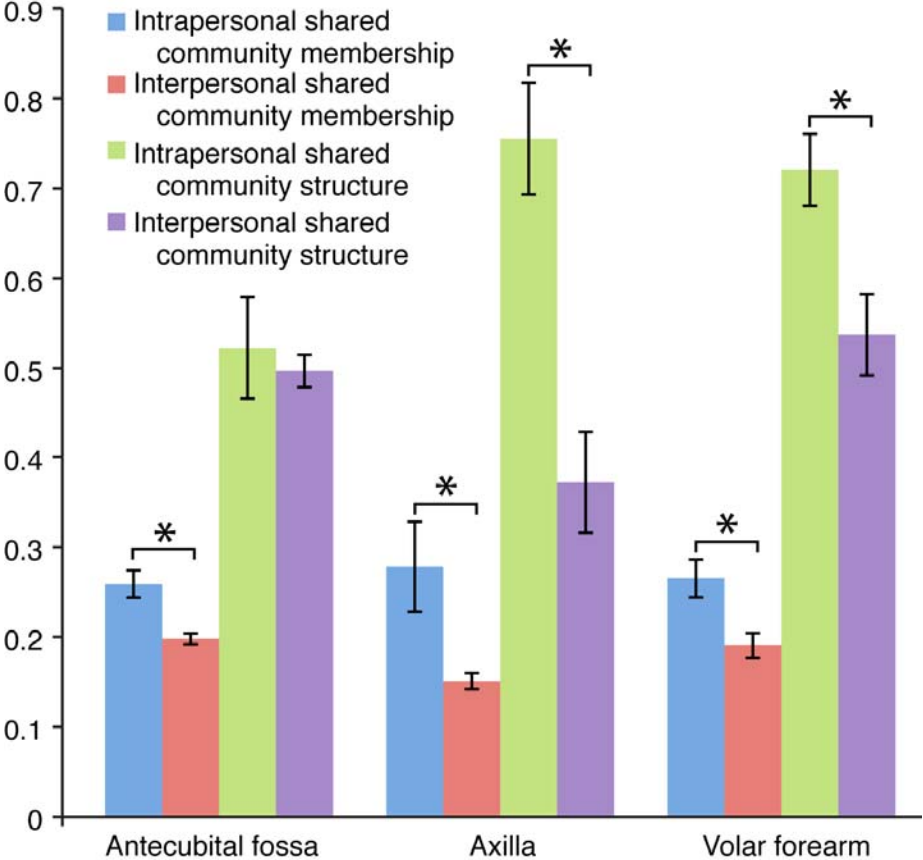

Grice *et al*, Figure S5

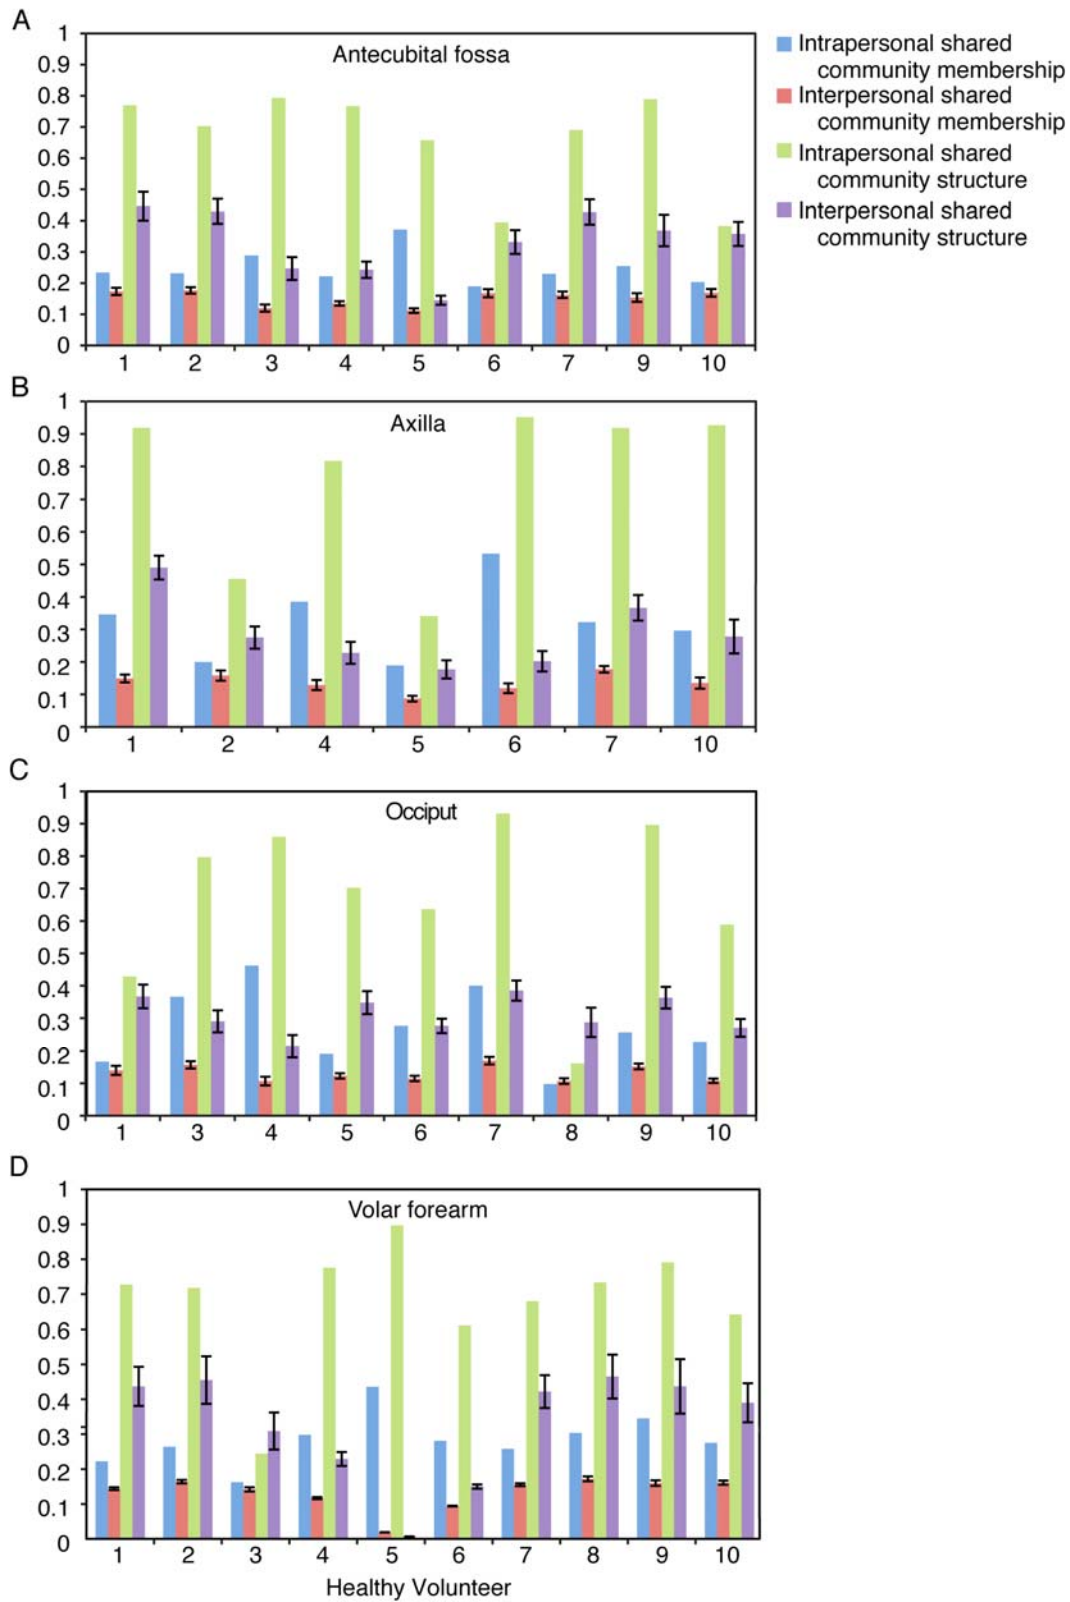

Grice *et al*, Figure S6

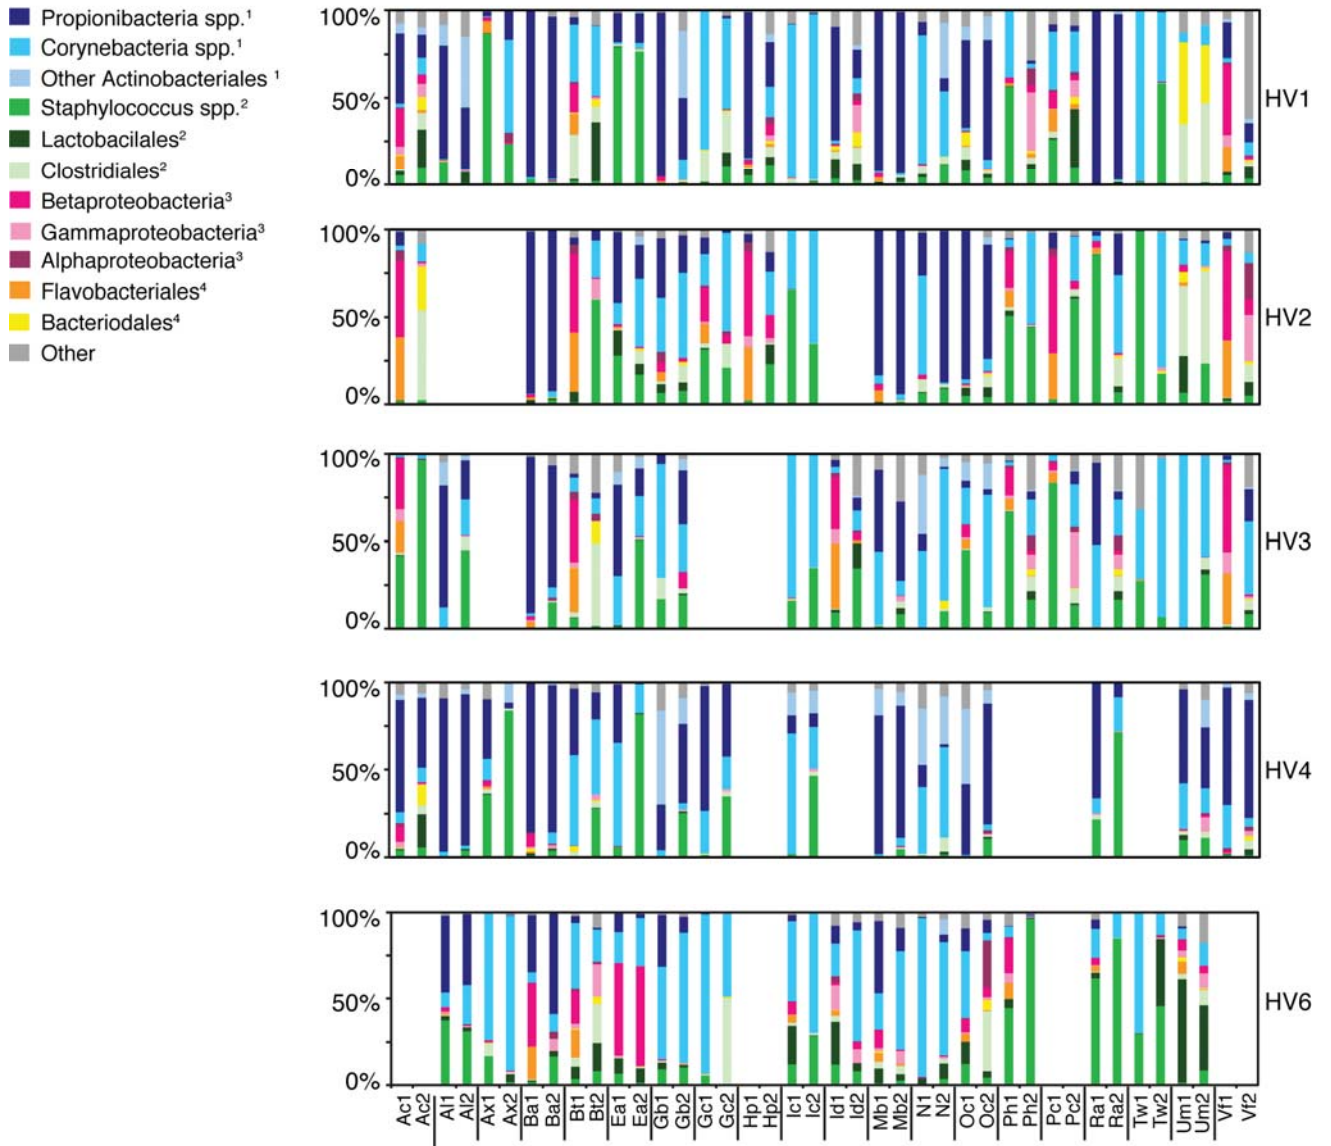

Grice *et al*, Table S1

| site  | HV1-1 | HV1-2 | HV2-1 | HV2-2 | HV3-1 | HV3-2 | HV4-1 | HV4-2 | HV5 | HV6-1 | HV6-2 | HV7 | HV8 | HV9 | HV10 |
|-------|-------|-------|-------|-------|-------|-------|-------|-------|-----|-------|-------|-----|-----|-----|------|
| AcLSc | 317   | 0     | 320   | 550   | 0     | 278   | 0     | 291   | 0   | 270   | 208   | 301 | 44  | 347 | 264  |
| AcRSc | 278   | 334   | 304   | 283   | 285   | 297   | 270   | 194   | 212 | 295   | 0     | 655 | 303 | 302 | 254  |
| AcRSw | 338   | 282   | 303   | 258   | 199   | 245   | 253   | 273   | 315 | 269   | 250   | 312 | 0   | 296 | 269  |
| AlRSc | 330   | 301   | 304   | 0     | 287   | 349   | 342   | 207   | 250 | 314   | 211   | 288 | 364 | 336 | 276  |
| AxLSc | 373   | 344   | 283   | 0     | 0     | 0     | 0     | 247   | 356 | 679   | 195   | 298 | 0   | 0   | 326  |
| AxRSc | 350   | 317   | 236   | 0     | 258   | 0     | 271   | 328   | 297 | 349   | 284   | 335 | 0   | 558 | 311  |
| AxRSw | 375   | 342   | 278   | 0     | 0     | 0     | 206   | 319   | 270 | 333   | 215   | 293 | 0   | 0   | 317  |
| BaCSc | 305   | 302   | 354   | 200   | 180   | 291   | 296   | 259   | 673 | 334   | 312   | 338 | 297 | 263 | 289  |
| BtRSc | 326   | 347   | 308   | 268   | 308   | 317   | 429   | 316   | 350 | 280   | 282   | 304 | 290 | 331 | 198  |
| EaRSw | 342   | 352   | 282   | 666   | 271   | 322   | 207   | 284   | 272 | 326   | 338   | 334 | 335 | 340 | 318  |
| GbCSc | 295   | 318   | 242   | 270   | 287   | 307   | 297   | 277   | 263 | 345   | 272   | 318 | 290 | 272 | 240  |
| GcCSc | 311   | 345   | 305   | 267   | 294   | 321   | 451   | 240   | 354 | 359   | 255   | 339 | 279 | 286 | 251  |
| HpRSc | 294   | 344   | 355   | 294   | 290   | 0     | 274   | 0     | 0   | 341   | 0     | 321 | 170 | 276 | 536  |
| IcRSc | 321   | 355   | 353   | 356   | 337   | 349   | 208   | 192   | 282 | 273   | 290   | 519 | 275 | 602 | 319  |
| IdRSc | 345   | 331   | 0     | 303   | 299   | 339   | 0     | 214   | 313 | 310   | 211   | 340 | 278 | 308 | 328  |
| MbCSc | 525   | 302   | 210   | 357   | 197   | 314   | 164   | 321   | 280 | 279   | 267   | 264 | 308 | 293 | 312  |
| NRSw  | 326   | 318   | 522   | 319   | 233   | 337   | 287   | 62    | 292 | 339   | 279   | 275 | 319 | 326 | 269  |
| OcCSc | 352   | 334   | 0     | 262   | 180   | 297   | 214   | 280   | 325 | 329   | 269   | 348 | 291 | 586 | 231  |
| OcCSw | 325   | 280   | 491   | 317   | 241   | 296   | 210   | 280   | 296 | 329   | 237   | 324 | 321 | 277 | 239  |
| PcRSc | 333   | 271   | 341   | 252   | 223   | 309   | 194   | 0     | 220 | 280   | 0     | 339 | 277 | 319 | 209  |
| PhRSc | 335   | 333   | 299   | 343   | 310   | 325   | 141   | 0     | 263 | 306   | 194   | 305 | 269 | 319 | 327  |
| RaRSc | 286   | 357   | 893   | 260   | 314   | 328   | 169   | 154   | 0   | 337   | 318   | 319 | 191 | 280 | 291  |
| TwRSc | 355   | 365   | 363   | 296   | 213   | 360   | 244   | 269   | 295 | 342   | 274   | 299 | 305 | 499 | 334  |
| UmCSw | 303   | 299   | 346   | 269   | 331   | 318   | 304   | 252   | 354 | 322   | 271   | 325 | 540 | 336 | 313  |
| VfLSc | 323   | 0     | 326   | 243   | 0     | 161   | 0     | 333   | 0   | 314   | 249   | 297 | 250 | 527 | 255  |
| VfRSc | 318   | 355   | 338   | 218   | 208   | 168   | 206   | 239   | 345 | 274   | 0     | 323 | 339 | 349 | 321  |
| VfRSw | 367   | 0     | 341   | 566   | 247   | 274   | 282   | 219   | 328 | 281   | 215   | 337 | 270 | 322 | 318  |



Grice *et al*, Table S2

## SEBACEOUS SITES

|                              | HV1  | HV2  | HV3 | HV4  | HV5  | HV6 | HV7  | HV8 | HV9  | HV10 | total |
|------------------------------|------|------|-----|------|------|-----|------|-----|------|------|-------|
| Propionibacterium            | 1944 | 1364 | 773 | 1082 | 1208 | 612 | 1477 | 825 | 1071 | 809  | 11165 |
| Staphylococcus               | 384  | 915  | 249 | 12   | 211  | 469 | 301  | 348 | 612  | 400  | 3901  |
| Corynebacterium              | 27   | 185  | 624 | 357  | 337  | 662 | 45   | 41  | 18   | 56   | 2352  |
| Betaproteobacteria           | 27   | 81   | 34  | 21   | 100  | 399 | 171  | 456 | 492  | 435  | 2216  |
| Other                        | 105  | 35   | 101 | 189  | 212  | 107 | 142  | 283 | 23   | 81   | 1278  |
| Unclassified Actinomycetales | 91   | 2    | 103 | 400  | 0    | 0   | 250  | 6   | 12   | 16   | 880   |
| Flavobacteriales             | 20   | 70   | 29  | 4    | 4    | 122 | 97   | 135 | 250  | 106  | 842   |
| Lactobacillales              | 50   | 87   | 2   | 6    | 104  | 173 | 20   | 7   | 74   | 187  | 710   |
| Clostridiales                | 55   | 12   | 40  | 1    | 8    | 23  | 12   | 127 | 8    | 23   | 309   |
| Gammaproteobacteria          | 1    | 2    | 8   | 3    | 12   | 19  | 8    | 20  | 64   | 47   | 184   |
| Alphaproteobacteria          | 2    | 22   | 1   | 3    | 17   | 4   | 10   | 49  | 19   | 26   | 153   |
| Bacteroidales                | 54   | 1    | 0   | 8    | 9    | 3   | 0    | 7   | 4    | 10   | 96    |

## MOIST SITES

|                              | HV1  | HV2  | HV3 | HV4 | HV5  | HV6  | HV7 | HV8 | HV9  | HV10 | total |
|------------------------------|------|------|-----|-----|------|------|-----|-----|------|------|-------|
| Corynebacterium              | 1128 | 232  | 599 | 527 | 1379 | 1127 | 630 | 125 | 96   | 727  | 6570  |
| Betaproteobacteria           | 116  | 466  | 324 | 81  | 327  | 291  | 571 | 797 | 1797 | 339  | 5109  |
| Staphylococcus               | 616  | 1007 | 686 | 264 | 174  | 484  | 612 | 173 | 191  | 827  | 5034  |
| Flavobacteriales             | 98   | 275  | 184 | 14  | 24   | 152  | 201 | 352 | 599  | 160  | 2059  |
| Propionibacterium            | 360  | 92   | 25  | 527 | 49   | 49   | 190 | 252 | 71   | 23   | 1772  |
| Other                        | 111  | 39   | 120 | 71  | 128  | 60   | 340 | 114 | 46   | 28   | 1057  |
| Gammaproteobacteria          | 14   | 9    | 60  | 12  | 83   | 73   | 28  | 50  | 229  | 148  | 706   |
| Lactobacillales              | 54   | 15   | 15  | 15  | 14   | 205  | 41  | 9   | 47   | 20   | 435   |
| Clostridiales                | 94   | 17   | 44  | 27  | 12   | 56   | 80  | 22  | 36   | 30   | 418   |
| Alphaproteobacteria          | 9    | 48   | 23  | 16  | 38   | 16   | 36  | 81  | 63   | 17   | 347   |
| Unclassified Actinomycetales | 16   | 0    | 1   | 75  | 0    | 0    | 9   | 11  | 9    | 4    | 125   |
| Bacteroidales                | 13   | 1    | 13  | 16  | 8    | 1    | 2   | 0   | 9    | 1    | 64    |

## DRY SITES

|                              | HV1 | HV2 | HV3 | HV4 | HV5 | HV6 | HV7 | HV8 | HV9 | HV10 | total |
|------------------------------|-----|-----|-----|-----|-----|-----|-----|-----|-----|------|-------|
| Betaproteobacteria           | 189 | 479 | 344 | 101 | 12  | 96  | 217 | 404 | 430 | 556  | 2828  |
| Corynebacterium              | 116 | 13  | 43  | 278 | 615 | 167 | 69  | 7   | 1   | 40   | 1349  |
| Flavobacteriales             | 89  | 324 | 196 | 22  | 13  | 74  | 93  | 55  | 189 | 181  | 1236  |
| Propionibacterium            | 324 | 43  | 26  | 349 | 3   | 32  | 176 | 151 | 24  | 41   | 1169  |
| Gammaproteobacteria          | 23  | 23  | 53  | 77  | 4   | 148 | 27  | 18  | 242 | 28   | 643   |
| Staphylococcus               | 40  | 19  | 39  | 6   | 41  | 22  | 218 | 26  | 2   | 20   | 433   |
| Other                        | 32  | 28  | 53  | 20  | 3   | 58  | 45  | 44  | 7   | 139  | 429   |
| Lactobacillales              | 20  | 23  | 3   | 4   | 0   | 197 | 26  | 12  | 42  | 5    | 332   |
| Clostridiales                | 86  | 1   | 18  | 23  | 2   | 61  | 17  | 64  | 7   | 13   | 292   |
| Alphaproteobacteria          | 10  | 48  | 27  | 10  | 2   | 7   | 17  | 17  | 4   | 28   | 170   |
| Bacteroidales                | 3   | 0   | 3   | 14  | 0   | 33  | 1   | 1   | 1   | 4    | 60    |
| Unclassified Actinomycetales | 6   | 0   | 1   | 5   | 0   | 0   | 16  | 0   | 2   | 0    | 30    |

Grice *et al*, Table S3

|                   | Healthy Volunteer | Jaccard Index | Jaccard Index Control | Jaccard Control SE | Theta Index | Theta Index Control | Theta Control SE |
|-------------------|-------------------|---------------|-----------------------|--------------------|-------------|---------------------|------------------|
| Antecubital Fossa | 1                 | 0.265         | 0.191                 | 0.009              | 0.717       | 0.511               | 0.034            |
|                   | 2                 | 0.275         | 0.193                 | 0.008              | 0.503       | 0.494               | 0.039            |
|                   | 6                 | 0.306         | 0.213                 | 0.008              | 0.663       | 0.558               | 0.035            |
|                   | 7                 | 0.260         | 0.218                 | 0.011              | 0.477       | 0.521               | 0.040            |
|                   | 9                 | 0.192         | 0.179                 | 0.013              | 0.407       | 0.456               | 0.045            |
|                   | 10                | 0.258         | 0.196                 | 0.012              | 0.367       | 0.440               | 0.045            |
| Axilla            | 1                 | 0.186         | 0.175                 | 0.026              | 0.619       | 0.525               | 0.089            |
|                   | 2                 | 0.429         | 0.149                 | 0.026              | 0.883       | 0.400               | 0.092            |
|                   | 6                 | 0.326         | 0.119                 | 0.026              | 0.718       | 0.182               | 0.065            |
|                   | 7                 | 0.154         | 0.146                 | 0.028              | 0.637       | 0.349               | 0.081            |
|                   | 10                | 0.296         | 0.165                 | 0.028              | 0.919       | 0.404               | 0.091            |
| Volar forearm     | 1                 | 0.176         | 0.178                 | 0.013              | 0.644       | 0.579               | 0.046            |
|                   | 2                 | 0.208         | 0.175                 | 0.014              | 0.805       | 0.533               | 0.046            |
|                   | 6                 | 0.306         | 0.124                 | 0.012              | 0.520       | 0.274               | 0.044            |
|                   | 7                 | 0.328         | 0.212                 | 0.017              | 0.783       | 0.598               | 0.050            |
|                   | 8                 | 0.289         | 0.222                 | 0.019              | 0.704       | 0.586               | 0.050            |
|                   | 9                 | 0.259         | 0.215                 | 0.020              | 0.807       | 0.619               | 0.049            |
|                   | 10                | 0.292         | 0.213                 | 0.018              | 0.782       | 0.571               | 0.047            |

Grice *et al*, Table S4

|             | Healthy   | Jaccard Index |         | Jaccard Control | Theta Index |         | Theta Control |
|-------------|-----------|---------------|---------|-----------------|-------------|---------|---------------|
|             | Volunteer | Jaccard Index | Control | SE              | Theta Index | Control | SE            |
| Antecubital | 1         | 0.234         | 0.174   | 0.012           | 0.769       | 0.447   | 0.046         |
| Fossa       | 2         | 0.232         | 0.177   | 0.010           | 0.702       | 0.430   | 0.040         |
|             | 1         | 0.289         | 0.120   | 0.011           | 0.793       | 0.247   | 0.036         |
|             | 2         | 0.222         | 0.135   | 0.007           | 0.767       | 0.243   | 0.026         |
|             | 3         | 0.372         | 0.112   | 0.008           | 0.657       | 0.145   | 0.015         |
|             | 4         | 0.190         | 0.168   | 0.013           | 0.395       | 0.332   | 0.038         |
|             | 7         | 0.230         | 0.163   | 0.010           | 0.691       | 0.428   | 0.040         |
|             | 9         | 0.255         | 0.154   | 0.014           | 0.789       | 0.369   | 0.051         |
|             | 10        | 0.204         | 0.169   | 0.012           | 0.383       | 0.358   | 0.039         |
| Axilla      | 1         | 0.346         | 0.149   | 0.012           | 0.916       | 0.490   | 0.036         |
|             | 2         | 0.200         | 0.158   | 0.016           | 0.453       | 0.275   | 0.034         |
|             | 2         | 0.385         | 0.129   | 0.016           | 0.814       | 0.228   | 0.034         |
|             | 3         | 0.189         | 0.087   | 0.009           | 0.338       | 0.177   | 0.028         |
|             | 4         | 0.533         | 0.119   | 0.015           | 0.949       | 0.202   | 0.032         |
|             | 7         | 0.323         | 0.177   | 0.010           | 0.916       | 0.366   | 0.039         |
|             | 10        | 0.296         | 0.135   | 0.017           | 0.924       | 0.278   | 0.052         |
| Occiput     | 1         | 0.167         | 0.140   | 0.014           | 0.431       | 0.367   | 0.037         |
|             | 1         | 0.366         | 0.157   | 0.011           | 0.799       | 0.290   | 0.034         |
|             | 2         | 0.462         | 0.107   | 0.013           | 0.862       | 0.214   | 0.034         |
|             | 3         | 0.191         | 0.123   | 0.008           | 0.705       | 0.348   | 0.035         |
|             | 4         | 0.276         | 0.115   | 0.008           | 0.639       | 0.276   | 0.022         |
|             | 7         | 0.400         | 0.170   | 0.011           | 0.934       | 0.385   | 0.031         |
|             | 6         | 0.098         | 0.107   | 0.008           | 0.164       | 0.287   | 0.045         |
|             | 9         | 0.256         | 0.152   | 0.009           | 0.899       | 0.363   | 0.033         |
|             | 10        | 0.226         | 0.108   | 0.007           | 0.591       | 0.270   | 0.027         |
| Volar       | 1         | 0.222         | 0.144   | 0.004           | 0.728       | 0.437   | 0.056         |
| Forearm     | 2         | 0.264         | 0.164   | 0.005           | 0.719       | 0.455   | 0.068         |
|             | 1         | 0.163         | 0.142   | 0.006           | 0.245       | 0.309   | 0.053         |
|             | 2         | 0.298         | 0.117   | 0.003           | 0.776       | 0.229   | 0.020         |
|             | 3         | 0.436         | 0.019   | 0.000           | 0.898       | 0.007   | 0.000         |
|             | 4         | 0.281         | 0.094   | 0.001           | 0.611       | 0.150   | 0.006         |
|             | 7         | 0.258         | 0.155   | 0.004           | 0.681       | 0.422   | 0.047         |
|             | 6         | 0.304         | 0.172   | 0.007           | 0.734       | 0.465   | 0.063         |
|             | 9         | 0.346         | 0.160   | 0.008           | 0.792       | 0.437   | 0.078         |
|             | 10        | 0.275         | 0.161   | 0.006           | 0.643       | 0.390   | 0.056         |

Grice *et al*, Table S5

|                        | Jaccard Index |       | Theta Index |       |
|------------------------|---------------|-------|-------------|-------|
|                        | average       | SE    | average     | SE    |
| Alar crease            | 0.228         | 0.009 | 0.549       | 0.033 |
| Antecubital fossa      | 0.177         | 0.012 | 0.429       | 0.041 |
| Axilla                 | 0.121         | 0.011 | 0.217       | 0.022 |
| Back                   | 0.195         | 0.008 | 0.564       | 0.042 |
| Buttock                | 0.158         | 0.011 | 0.371       | 0.045 |
| Ext. auditory canal    | 0.176         | 0.008 | 0.363       | 0.035 |
| Glabella               | 0.133         | 0.008 | 0.403       | 0.040 |
| Gluteal crease         | 0.149         | 0.010 | 0.396       | 0.033 |
| Hypothenar palm        | 0.136         | 0.009 | 0.307       | 0.044 |
| Inguinal crease        | 0.174         | 0.010 | 0.359       | 0.037 |
| Interdigital web space | 0.119         | 0.012 | 0.243       | 0.033 |
| Manubrium              | 0.186         | 0.009 | 0.454       | 0.023 |
| Nare                   | 0.215         | 0.008 | 0.483       | 0.035 |
| Occiput                | 0.147         | 0.009 | 0.258       | 0.027 |
| Plantar heel           | 0.170         | 0.015 | 0.348       | 0.036 |
| Popliteal fossa        | 0.143         | 0.012 | 0.387       | 0.036 |
| Retroauricular crease  | 0.154         | 0.012 | 0.384       | 0.042 |
| Toeweb                 | 0.111         | 0.012 | 0.267       | 0.035 |
| Umbilicus              | 0.057         | 0.008 | 0.114       | 0.023 |
| Volar forearm          | 0.154         | 0.020 | 0.371       | 0.067 |

Grice *et al*, Table S6

|                        |                        | Median                 | Median            |       |
|------------------------|------------------------|------------------------|-------------------|-------|
| Pairwise comparison    |                        | Jaccard                | Theta             |       |
| A                      | Antecubital Fossa      | Alar Crease            | 0.181             | 0.599 |
|                        |                        | Axilla                 | 0.164             | 0.489 |
|                        |                        | Back                   | 0.169             | 0.636 |
|                        |                        | Buttock                | 0.265             | 0.658 |
|                        |                        | Ext.Auditory Canal     | 0.098             | 0.170 |
|                        |                        | Glabella               | 0.199             | 0.607 |
|                        |                        | Gluteal Crease         | 0.200             | 0.440 |
|                        |                        | Hypothenar Palm        | 0.195             | 0.538 |
|                        |                        | Inguinal Crease        | 0.159             | 0.339 |
|                        |                        | Interdigital Web Space | 0.197             | 0.502 |
|                        |                        | Manubrium              | 0.268             | 0.669 |
|                        |                        | Nare                   | 0.085             | 0.205 |
|                        |                        | Occiput                | 0.183             | 0.473 |
|                        |                        | Popliteal Fossa        | 0.224             | 0.601 |
|                        |                        | Plantar Heel           | 0.254             | 0.656 |
|                        |                        | Retroauricular Crease  | 0.209             | 0.536 |
|                        |                        | Toeweb                 | 0.143             | 0.308 |
|                        |                        | Umbilicus              | 0.119             | 0.124 |
|                        |                        | Volar Forearm          | 0.285             | 0.666 |
|                        |                        | Popliteal Fossa        | Antecubital Fossa | 0.234 |
| Alar Crease            | 0.175                  |                        | 0.384             |       |
| Axilla                 | 0.143                  |                        | 0.430             |       |
| Back                   | 0.143                  |                        | 0.365             |       |
| Buttock                | 0.220                  |                        | 0.567             |       |
| Ext.Auditory Canal     | 0.124                  |                        | 0.166             |       |
| Glabella               | 0.177                  |                        | 0.404             |       |
| Gluteal Crease         | 0.249                  |                        | 0.589             |       |
| Hypothenar Palm        | 0.175                  |                        | 0.401             |       |
| Inguinal Crease        | 0.181                  |                        | 0.350             |       |
| Interdigital Web Space | 0.205                  |                        | 0.468             |       |
| Manubrium              | 0.183                  |                        | 0.499             |       |
| Nare                   | 0.101                  |                        | 0.181             |       |
| Occiput                | 0.146                  |                        | 0.189             |       |
| Plantar Heel           | 0.190                  |                        | 0.523             |       |
| Retroauricular Crease  | 0.247                  |                        | 0.470             |       |
| Toeweb                 | 0.128                  |                        | 0.358             |       |
| Umbilicus              | 0.130                  |                        | 0.372             |       |
| Volar Forearm          | 0.233                  |                        | 0.586             |       |
| Retroauricular Crease  | Antecubital Fossa      |                        | 0.209             | 0.536 |
|                        | Alar Crease            | 0.317                  | 0.637             |       |
|                        | Axilla                 | 0.140                  | 0.128             |       |
|                        | Back                   | 0.211                  | 0.365             |       |
|                        | Buttock                | 0.153                  | 0.375             |       |
|                        | Ext.Auditory Canal     | 0.180                  | 0.595             |       |
|                        | Glabella               | 0.214                  | 0.757             |       |
|                        | Gluteal Crease         | 0.169                  | 0.409             |       |
|                        | Hypothenar Palm        | 0.163                  | 0.150             |       |
|                        | Inguinal Crease        | 0.133                  | 0.344             |       |
|                        | Interdigital Web Space | 0.152                  | 0.419             |       |
|                        | Manubrium              | 0.234                  | 0.644             |       |
|                        | Nare                   | 0.216                  | 0.473             |       |
|                        | Occiput                | 0.200                  | 0.489             |       |
|                        | Popliteal Fossa        | 0.247                  | 0.470             |       |
|                        | Plantar Heel           | 0.143                  | 0.317             |       |
|                        | Toeweb                 | 0.148                  | 0.409             |       |
|                        | Umbilicus              | 0.070                  | 0.121             |       |
|                        | Volar Forearm          | 0.160                  | 0.501             |       |
|                        | B                      | Umbilicus              | Antecubital Fossa | 0.123 |
| Alar Crease            |                        |                        | 0.115             | 0.147 |
| Axilla                 |                        |                        | 0.075             | 0.139 |
| Back                   |                        |                        | 0.124             | 0.158 |
| Buttock                |                        |                        | 0.138             | 0.160 |
| Ext.Auditory Canal     |                        |                        | 0.053             | 0.038 |
| Glabella               |                        |                        | 0.130             | 0.431 |
| Gluteal Crease         |                        |                        | 0.146             | 0.292 |
| Hypothenar Palm        |                        |                        | 0.111             | 0.068 |
| Inguinal Crease        |                        |                        | 0.158             | 0.409 |
| Interdigital Web Space |                        |                        | 0.157             | 0.264 |
| Manubrium              |                        |                        | 0.172             | 0.221 |
| Nare                   |                        |                        | 0.071             | 0.054 |
| Occiput                |                        |                        | 0.108             | 0.082 |
| Popliteal Fossa        |                        |                        | 0.105             | 0.270 |
| Plantar Heel           |                        |                        | 0.141             | 0.229 |
| Retroauricular Crease  |                        |                        | 0.070             | 0.292 |
| Toeweb                 |                        |                        | 0.104             | 0.157 |
| Volar Forearm          |                        |                        | 0.149             | 0.244 |
| Occiput                |                        |                        | Antecubital Fossa | 0.183 |
|                        | Alar Crease            | 0.173                  | 0.530             |       |
|                        | Axilla                 | 0.146                  | 0.181             |       |
|                        | Back                   | 0.179                  | 0.452             |       |
|                        | Buttock                | 0.171                  | 0.394             |       |
|                        | Ext.Auditory Canal     | 0.128                  | 0.223             |       |
|                        | Glabella               | 0.196                  | 0.428             |       |
|                        | Gluteal Crease         | 0.140                  | 0.279             |       |
|                        | Hypothenar Palm        | 0.165                  | 0.339             |       |
|                        | Inguinal Crease        | 0.158                  | 0.224             |       |
|                        | Interdigital Web Space | 0.174                  | 0.427             |       |
|                        | Manubrium              | 0.196                  | 0.565             |       |
|                        | Nare                   | 0.127                  | 0.247             |       |
|                        | Popliteal Fossa        | 0.146                  | 0.189             |       |
|                        | Plantar Heel           | 0.125                  | 0.207             |       |
|                        | Retroauricular Crease  | 0.200                  | 0.489             |       |
|                        | Toeweb                 | 0.114                  | 0.179             |       |
|                        | Umbilicus              | 0.108                  | 0.082             |       |
|                        | Volar Forearm          | 0.174                  | 0.401             |       |
|                        | Gluteal Crease         | Antecubital Fossa      | 0.225             | 0.448 |
| Alar Crease            |                        | 0.160                  | 0.372             |       |
| Axilla                 |                        | 0.179                  | 0.502             |       |
| Back                   |                        | 0.147                  | 0.463             |       |
| Buttock                |                        | 0.226                  | 0.592             |       |
| Ext.Auditory Canal     |                        | 0.115                  | 0.179             |       |
| Glabella               |                        | 0.183                  | 0.441             |       |
| Hypothenar Palm        |                        | 0.129                  | 0.177             |       |
| Inguinal Crease        |                        | 0.210                  | 0.572             |       |
| Interdigital Web Space |                        | 0.190                  | 0.322             |       |
| Manubrium              |                        | 0.200                  | 0.564             |       |
| Nare                   |                        | 0.112                  | 0.138             |       |
| Occiput                |                        | 0.140                  | 0.279             |       |
| Popliteal Fossa        |                        | 0.249                  | 0.589             |       |
| Plantar Heel           |                        | 0.183                  | 0.568             |       |
| Retroauricular Crease  |                        | 0.169                  | 0.409             |       |
| Toeweb                 |                        | 0.149                  | 0.457             |       |
| Umbilicus              |                        | 0.146                  | 0.292             |       |
| Volar Forearm          |                        | 0.193                  | 0.435             |       |

Grice *et al*, Table S6 continued

C.

| Pairwise comparison |                        | Median<br>Jaccard | Median<br>Theta |
|---------------------|------------------------|-------------------|-----------------|
| Nare                | Antecubital Fossa      | 0.104             | 0.205           |
|                     | Alar Crease            | 0.292             | 0.568           |
|                     | Avilla                 | 0.066             | 0.127           |
|                     | Back                   | 0.142             | 0.152           |
|                     | Buttock                | 0.078             | 0.076           |
|                     | Ext. Auditory Canal    | 0.182             | 0.247           |
|                     | Glabella               | 0.136             | 0.300           |
|                     | Gluteal Crease         | 0.104             | 0.138           |
|                     | Hypohelar Palm         | 0.094             | 0.128           |
|                     | Inguinal Crease        | 0.125             | 0.165           |
|                     | Interdigital Web Space | 0.103             | 0.163           |
|                     | Manubrium              | 0.195             | 0.325           |
|                     | Occiput                | 0.128             | 0.274           |
|                     | Popliteal Fossa        | 0.114             | 0.181           |
|                     | Planter Heel           | 0.098             | 0.140           |
|                     | Retroauricular Crease  | 0.217             | 0.473           |
|                     | Toeweb                 | 0.081             | 0.110           |
|                     | Umbilicus              | 0.090             | 0.090           |
|                     | Volar Forearm          | 0.105             | 0.180           |

Grice *et al*, Table S7

| Subsite               | Healthy Volunteer | Jaccard Index | Theta Index | Jaccard Control | Theta control |
|-----------------------|-------------------|---------------|-------------|-----------------|---------------|
| Antecubital Fossa     | 1                 | 0.202         | 0.367       | 0.150           | 0.333         |
|                       | 2                 | 0.104         | 0.033       | 0.129           | 0.240         |
|                       | 3                 | 0.139         | 0.287       | 0.102           | 0.165         |
|                       | 4                 | 0.176         | 0.508       | 0.114           | 0.214         |
| Alar Crease           | 1                 | 0.143         | 0.570       | 0.195           | 0.548         |
|                       | 3                 | 0.259         | 0.571       | 0.221           | 0.562         |
|                       | 4                 | 0.273         | 0.689       | 0.189           | 0.307         |
|                       | 6                 | 0.250         | 0.554       | 0.176           | 0.445         |
| Axilla                | 1                 | 0.122         | 0.783       | 0.107           | 0.271         |
|                       | 4                 | 0.195         | 0.635       | 0.094           | 0.190         |
|                       | 6                 | 0.129         | 0.257       | 0.078           | 0.114         |
| Buttock               | 1                 | 0.125         | 0.184       | 0.113           | 0.207         |
|                       | 2                 | 0.058         | 0.023       | 0.108           | 0.234         |
|                       | 3                 | 0.167         | 0.211       | 0.116           | 0.223         |
|                       | 4                 | 0.188         | 0.530       | 0.101           | 0.166         |
| Back                  | 6                 | 0.178         | 0.273       | 0.139           | 0.235         |
|                       | 1                 | 0.172         | 0.769       | 0.173           | 0.533         |
|                       | 2                 | 0.171         | 0.627       | 0.196           | 0.595         |
|                       | 3                 | 0.200         | 0.614       | 0.183           | 0.574         |
|                       | 4                 | 0.217         | 0.662       | 0.156           | 0.258         |
|                       | 6                 | 0.120         | 0.289       | 0.181           | 0.448         |
| Ext. Auditory Canal   | 1                 | 0.317         | 0.904       | 0.189           | 0.447         |
|                       | 2                 | 0.254         | 0.529       | 0.143           | 0.353         |
|                       | 3                 | 0.200         | 0.550       | 0.150           | 0.362         |
|                       | 4                 | 0.200         | 0.594       | 0.171           | 0.372         |
| Glabella              | 6                 | 0.231         | 0.842       | 0.155           | 0.198         |
|                       | 1                 | 0.177         | 0.653       | 0.144           | 0.449         |
|                       | 2                 | 0.164         | 0.404       | 0.112           | 0.287         |
|                       | 3                 | 0.205         | 0.696       | 0.129           | 0.394         |
|                       | 4                 | 0.158         | 0.614       | 0.139           | 0.377         |
|                       | 6                 | 0.182         | 0.870       | 0.093           | 0.240         |
| Gluteal Crease        | 1                 | 0.135         | 0.440       | 0.118           | 0.359         |
|                       | 2                 | 0.179         | 0.486       | 0.149           | 0.393         |
|                       | 3                 | 0.297         | 0.892       | 0.162           | 0.442         |
|                       | 4                 | 0.283         | 0.657       | 0.148           | 0.276         |
| Inguinal Crease       | 6                 | 0.156         | 0.395       | 0.156           | 0.389         |
|                       | 1                 | 0.283         | 0.856       | 0.199           | 0.400         |
|                       | 2                 | 0.253         | 0.871       | 0.208           | 0.529         |
|                       | 3                 | 0.184         | 0.389       | 0.203           | 0.481         |
|                       | 4                 | 0.324         | 0.649       | 0.197           | 0.334         |
|                       | 6                 | 0.136         | 0.522       | 0.197           | 0.479         |
| Interglital Web Space | 1                 | 0.096         | 0.258       | 0.099           | 0.239         |
|                       | 3                 | 0.235         | 0.514       | 0.145           | 0.267         |
|                       | 6                 | 0.128         | 0.298       | 0.097           | 0.170         |
| Manubrium             | 1                 | 0.167         | 0.842       | 0.185           | 0.535         |
|                       | 2                 | 0.250         | 0.346       | 0.187           | 0.466         |
|                       | 3                 | 0.200         | 0.487       | 0.179           | 0.422         |
|                       | 4                 | 0.156         | 0.602       | 0.156           | 0.435         |
| Nae                   | 6                 | 0.143         | 0.402       | 0.130           | 0.323         |
|                       | 1                 | 0.200         | 0.775       | 0.222           | 0.552         |
|                       | 2                 | 0.233         | 0.354       | 0.200           | 0.485         |
|                       | 3                 | 0.235         | 0.789       | 0.214           | 0.523         |
| Occiput               | 4                 | 0.206         | 0.782       | 0.217           | 0.577         |
|                       | 6                 | 0.255         | 0.807       | 0.185           | 0.371         |
|                       | 1                 | 0.250         | 0.888       | 0.164           | 0.417         |
|                       | 3                 | 0.216         | 0.654       | 0.132           | 0.209         |
|                       | 4                 | 0.269         | 0.574       | 0.134           | 0.273         |
|                       | 6                 | 0.082         | 0.081       | 0.108           | 0.168         |
| Popliteal Fossa       | 1                 | 0.143         | 0.276       | 0.127           | 0.296         |
|                       | 2                 | 0.049         | 0.029       | 0.125           | 0.319         |
|                       | 3                 | 0.130         | 0.368       | 0.119           | 0.321         |
| Plantar Heel          | 1                 | 0.061         | 0.099       | 0.137           | 0.230         |
|                       | 2                 | 0.209         | 0.377       | 0.158           | 0.340         |
|                       | 3                 | 0.203         | 0.288       | 0.165           | 0.291         |
|                       | 6                 | 0.133         | 0.358       | 0.130           | 0.277         |
| Retroauricular Crease | 1                 | 0.087         | 0.637       | 0.100           | 0.309         |
|                       | 2                 | 0.087         | 0.066       | 0.120           | 0.312         |
|                       | 3                 | 0.214         | 0.574       | 0.164           | 0.413         |
|                       | 4                 | 0.250         | 0.619       | 0.156           | 0.386         |
| Toeweb                | 6                 | 0.220         | 0.706       | 0.121           | 0.288         |
|                       | 1                 | 0.174         | 0.865       | 0.126           | 0.334         |
|                       | 2                 | 0.185         | 0.522       | 0.135           | 0.290         |
|                       | 3                 | 0.304         | 0.808       | 0.083           | 0.111         |
|                       | 4                 | 0.122         | 0.353       | 0.109           | 0.311         |
|                       | 6                 | 0.222         | 0.687       | 0.139           | 0.326         |
| Umbilicus             | 1                 | 0.192         | 0.463       | 0.047           | 0.067         |
|                       | 2                 | 0.180         | 0.405       | 0.102           | 0.202         |
|                       | 3                 | 0.125         | 0.514       | 0.068           | 0.091         |
|                       | 4                 | 0.180         | 0.627       | 0.081           | 0.157         |
| Volar Forearm         | 6                 | 0.206         | 0.418       | 0.071           | 0.117         |
|                       | 1                 | 0.164         | 0.270       | 0.149           | 0.306         |
|                       | 2                 | 0.055         | 0.023       | 0.109           | 0.236         |
|                       | 3                 | 0.180         | 0.071       | 0.146           | 0.299         |
|                       | 4                 | 0.149         | 0.638       | 0.121           | 0.186         |

**Additional Authors, NISC Comparative Sequencing Program:**

Beatrice Benjamin  
Shelise Brooks  
Grace Chu  
Irina Chub  
Holly Coleman  
Lyudmila Dekhtyar  
Tatyana Fuksenko  
Maria Gestole  
Michael Gregory  
Xiaobin Guan  
Jyoti Gupta  
Natalie Gurson  
Peggy Hall  
Joel Han  
Nancy Hansen  
April Hargrove  
Keisha Hines-Harris  
Shiling Ho  
Taccara Johnson  
Richelle Legaspi  
Sean Lovett  
Maureen Madden  
Quino Maduro  
Cathy Masiello  
Baishali Maskeri  
Jenny McDowell  
Casandra Montemayor  
Jim Mullikin  
Jerlil Myrick  
Amber Palumbo  
Morgan Park  
Colleen Ramsahoye  
Natalie Reddix-Dugue  
Nancy Riebow  
Karen Schandler  
Brian Schmidt  
Christina Sison  
Lauren Smith  
Sirintorn Stantripop  
Pam Jacques Thomas
